# Supplementary material for: CD11c+ CD8 T cells cause IFN-γ–dependent autoimmune neuroinflammation that is restrained by PD-1 signaling
Source: JCI journal article supplement (doi:10.1172/jci.insight.179789), 2026-05-22
Supplement: sd1 [file 1]

## SUPPLEMENTAL INFORMATION

### Supplemental Figure 1

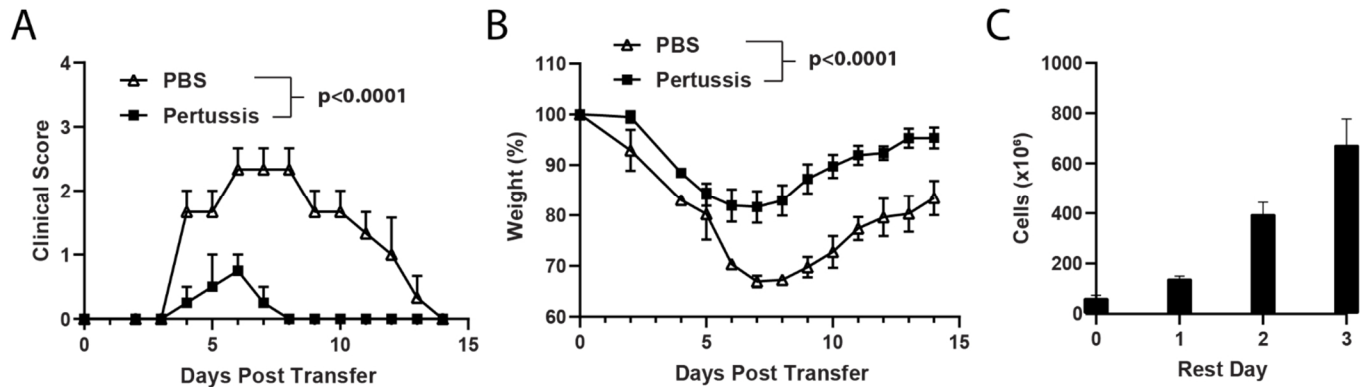

**Supplemental Figure 1. A single activation is sufficient to render Tc1 cells encephalitogenic, and pertussis toxin suppresses Tc1-mediated EAE.** Splenocytes from 8.8 mice were stimulated with the MBP<sub>79-87</sub> peptide for 3 days under Tc1-polarizing conditions, which consisted of IL-12 (2 ng/mL) and IL-2 (5-10 ng/mL). After 72 h, cells were rested in 10 ng/mL IL-2; each day, cells were split and replated in fresh media supplemented with IL-2. On the third day, CD8 T cells were purified by MACS *via* negative selection, and  $2 \times 10^7$  cells in 300  $\mu$ L RPMI (media only without FBS) were i.v. injected into naïve C3HeB/FeJ recipients along with 0.4  $\mu$ g IL-2 per mouse. **A**) Clinical course for CD8-EAE in mice that were injected i.p. with either 200 ng pertussis toxin or PBS on day 0 and 2 post transfer (n=3 mice per group). **B**) Change in weight during CD8-EAE. Significance was determined by Two-way ANOVA. **C**) Cell number in cultures over the course of rest/expansion following 3 days of activation. In the experiments shown, splenocytes from two 8.8 donor mice were used.

## Supplemental Figure 2

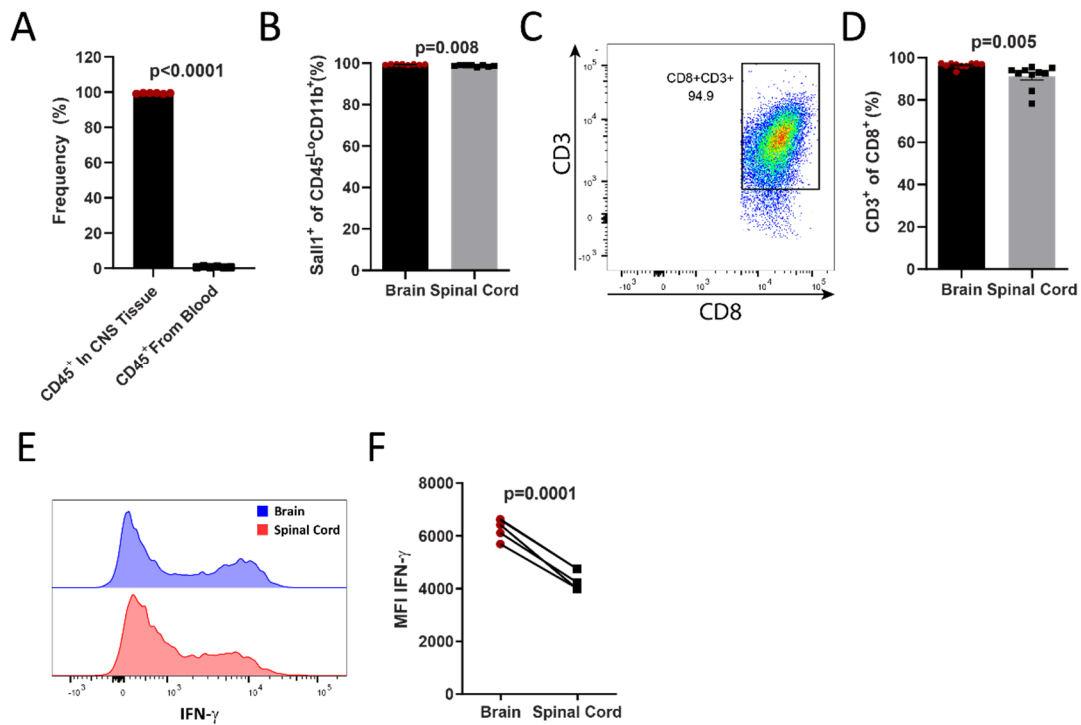

**Supplemental Figure 2. Tc1 cells cause distinct inflammation in the brain and spinal cord.** CD8-EAE was induced by i.v. transfer of  $2 \times 10^7$  Tc1 cells. **A)** Quantification of cells from the CNS of mice with CD8-EAE that are resident/infiltrating vs. those deriving from blood. On day 7 post-transfer, to label CD45<sup>+</sup> cells in the blood, 10  $\mu$ g of a fluorochrome-labeled anti-CD45 mAb was injected i.v. 5 min prior to perfusion and CNS isolation. After isolating cells from the CNS, the cells were stained with an anti-CD45 mAb conjugated to a different fluorochrome than the i.v.-injected anti-CD45 mAb, and the frequency of CD45<sup>+</sup> cells in CNS tissue and CD45<sup>+</sup> cells derived from blood was determined. **B)** Frequency of Sall1<sup>+</sup> cells among CD45<sup>Lo</sup>CD11b<sup>+</sup> cells in the brain and spinal cord. **C)** Flow cytometry plot showing CD3 and CD8 expression among CD45<sup>+</sup>Sall1<sup>-</sup> cells (non-microglial immune cells). **D)** Frequency of CD3<sup>+</sup> cells among CD8<sup>+</sup> cells in the brain and spinal cord. **E)** Histograms depicting IFN- $\gamma$  expression among monocytes. **F)** MFI of IFN- $\gamma$ <sup>+</sup> cells in CD45<sup>Hi</sup>CD11b<sup>+</sup>Ly6G<sup>Lo/-</sup>Ly6C<sup>+</sup> monocytes from the brain and spinal cord. Significance of A-C was determined by an unpaired t-test. Significance for E was determined by a paired t-test.

### Supplemental Figure 3

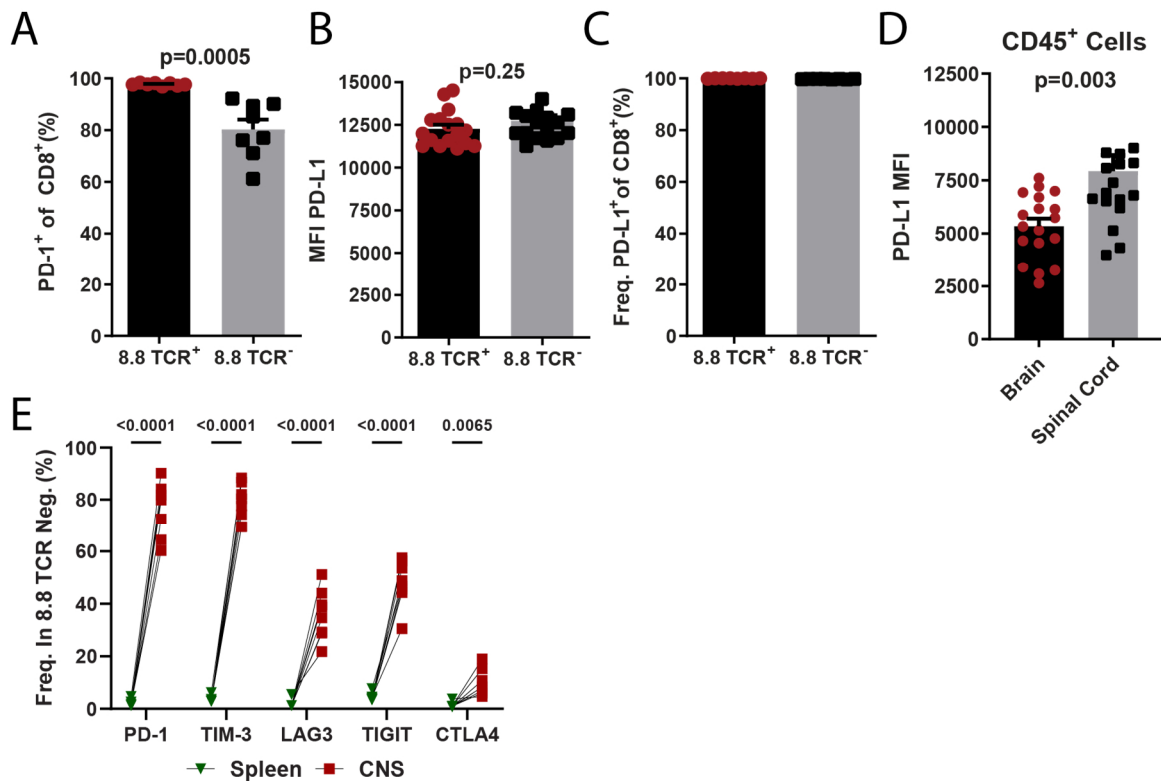

**Supplemental Figure 3. CNS CD8 T cells in CD8-EAE are predominantly CD11c<sup>+</sup> with a terminal effector phenotype.** CD8-EAE was induced by i.v. transfer of  $2 \times 10^7$  Tc1 cells, and mice were sacrificed 7 days after transfer. Brain and spinal cord cells were analyzed by flow cytometry. **A)** Frequency of PD-1<sup>+</sup> cells among 8.8 TCR<sup>+</sup> and 8.8 TCR<sup>-</sup> CD8 T cells from the CNS (brain + SC). **B)** MFI of PD-L1<sup>+</sup> cells among CD8<sup>+</sup> cells. **C)** Frequency of PD-L1<sup>+</sup> cells among CD8<sup>+</sup> cells. Significance for A-C determined by an unpaired t-test. **D)** MFI of PD-L1 among CD45<sup>+</sup> cells. Significance was determined by a paired t-test. **E)** Frequency of cells expressing PD-1, TIM-3, LAG3, TIGIT, and CTLA4 among 8.8 TCR<sup>-</sup> CD8<sup>+</sup> cells in the spleen and CNS. Significance was calculated by two-way ANOVA followed by Šídák's multiple comparisons test. N=8 mice.

## Supplemental Figure 4

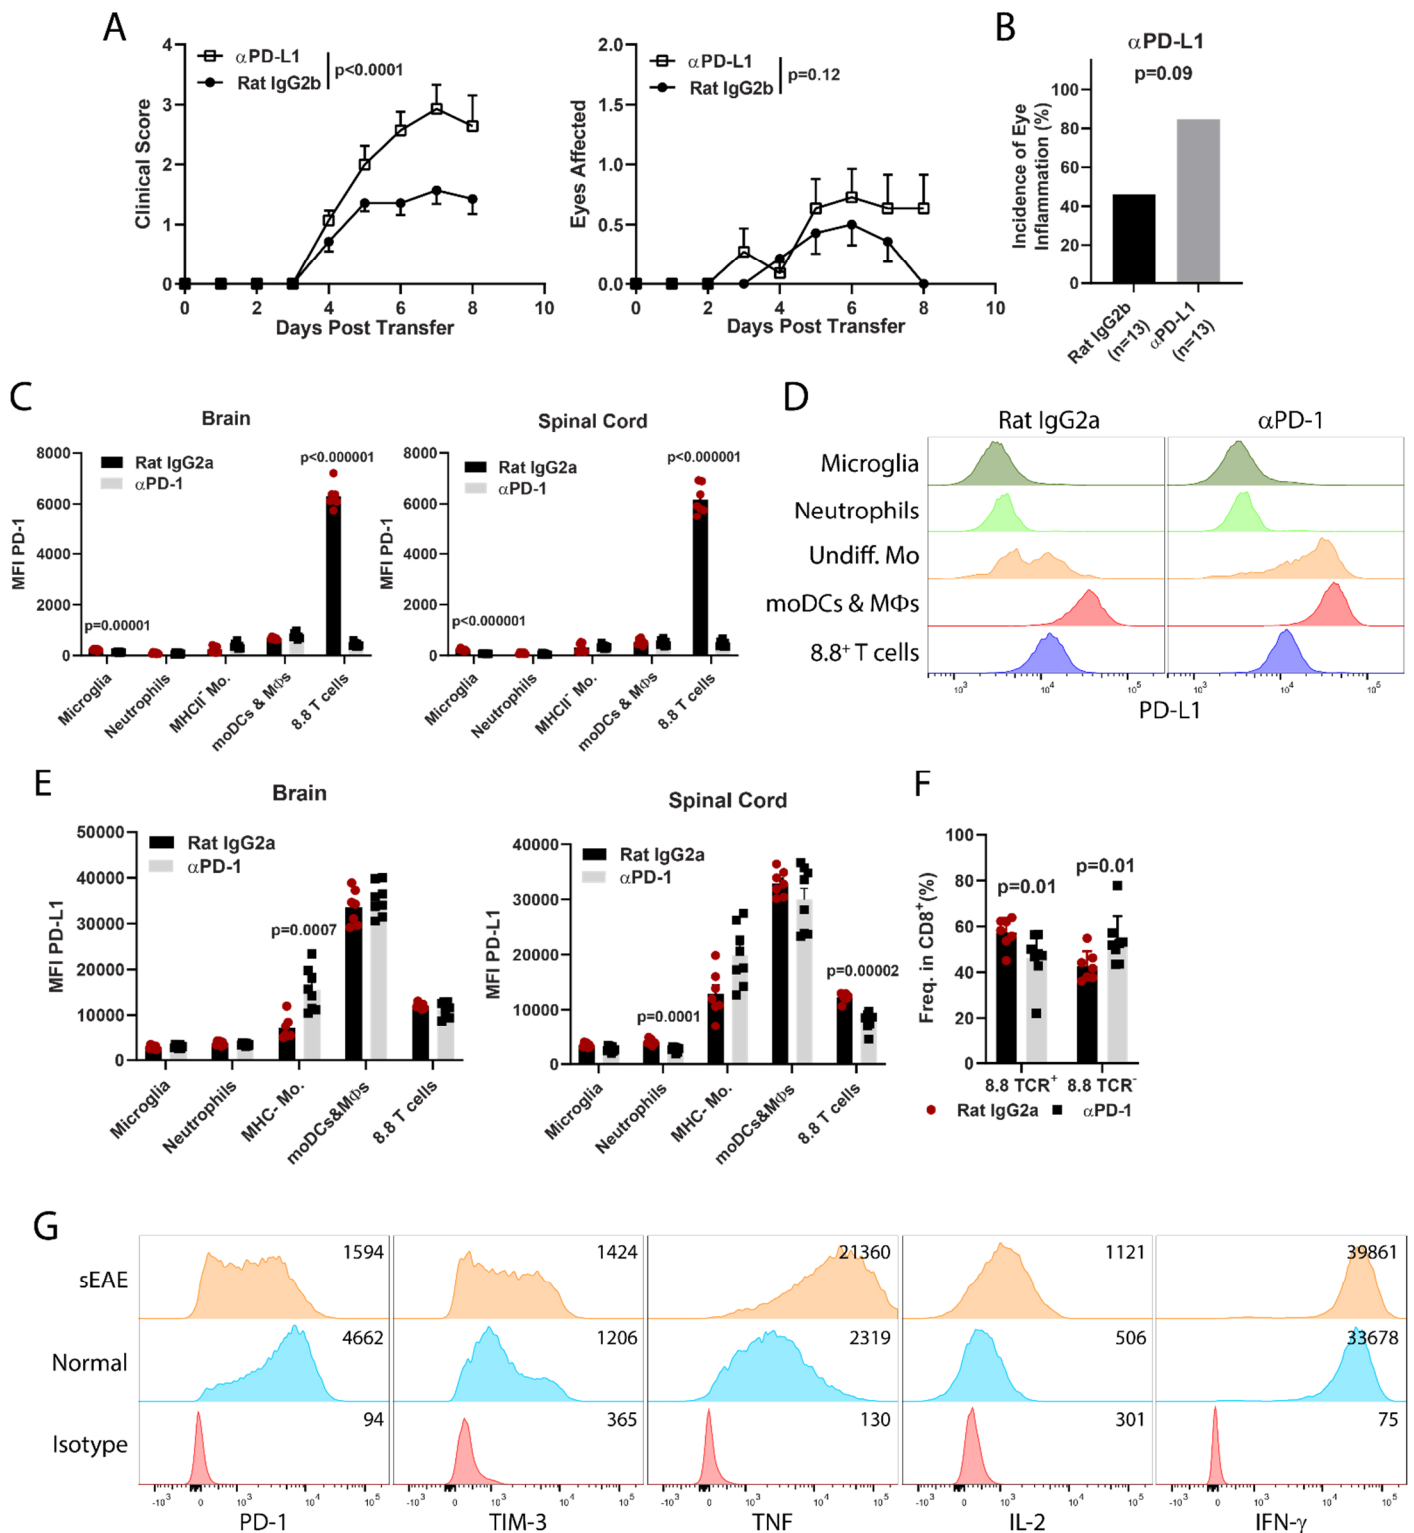

**Supplemental Figure 4. Blocking PD-L1 exacerbates CD8-EAE.** **A)** CD8-EAE was induced, and recipient mice were treated with 200  $\mu$ g  $\alpha$ PD-L1 or isotype mAb (Rat IgG2b) once per day starting from the day of CD8-EAE induction (n=14 per group; compiled from 3 independent experiments). Statistical significance was determined by two-way ANOVA. **B)** Incidence of eye inflammation in mice treated with  $\alpha$ PD-L1, or isotype mAb. Significance was determined by the Chi-squared test. **C)** MFI for PD-1 in the brain and spinal cord among cell populations. **D)** Flow cytometry histograms depicting expression of PD-L1 among cell populations. **E)** MFI for

PD-L1 in the brain and spinal cord among populations. **F)** Frequency of 8.8 TCR<sup>+</sup> and 8.8 TCR<sup>-</sup> cells among CD8<sup>+</sup> cells. For D-F, statistical significance was determined by a two-tailed unpaired t-test. **G)** Histograms depicting expression of PD-1, TIM-3, TNF, IL-2, and IFN- $\gamma$  by 8.8 CD8 T cells stimulated for 3 days with MBP<sub>79-87</sub> that were derived from an 8.8 mouse with spontaneous EAE (sEAE) or normal-appearing donors.

### Supplemental Figure 5

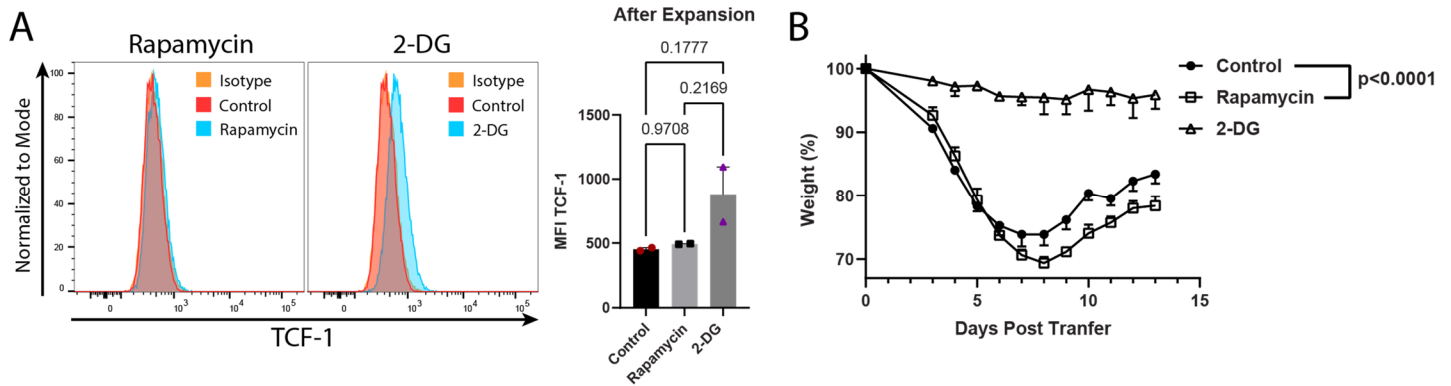

**Supplemental Figure 5. Rapamycin-treated 8.8 CD8 T cells induce greater weight loss, and 2-DG-treated cells express TCF-1.** **A)** Expression of TCF-1 among control, rapamycin- and 2-DG-treated CD8 T cells after 3-day stimulation and 3-day rest. Cells were treated with 4 mM 2-DG during both activation and rest. **B)** Change in weight of CD8-EAE mice after disease was induced by transfer of control, rapamycin- or 2-DG-treated CD8 T cells. Significance was determined by a two-way ANOVA comparing the control group with each treatment.

## Supplemental Figure 6

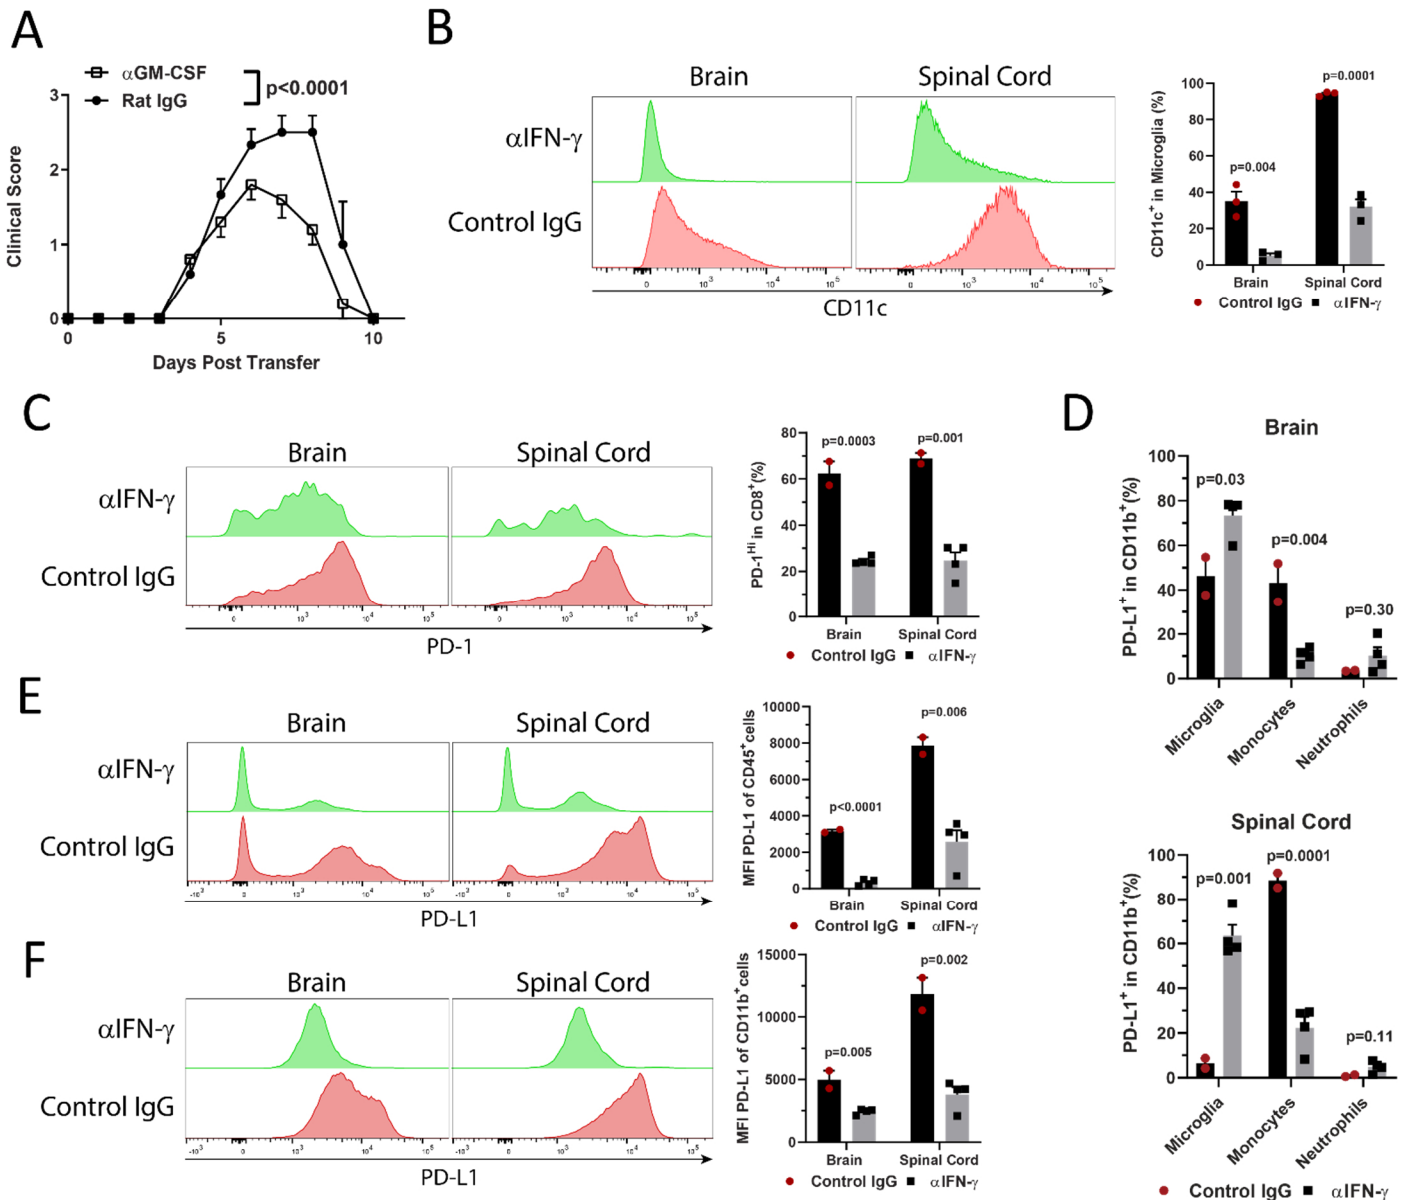

**Supplemental Figure 6. Blocking GM-CSF suppresses EAE, and PD-L1 expression is altered by blocking IFN- $\gamma$ .** **A**) Clinical scores of CD8-EAE mice treated with anti-GM-CSF or isotype control mAb (400  $\mu$ g/day; n=5-10 per/group). **B**) Histograms depicting expression of CD11c by microglia and the frequency of CD11c<sup>+</sup> microglia in the brain and spinal cord of mice treated with anti-IFN- $\gamma$  mAb or control IgG. **C**) Histograms depicting expression of PD-1 among CD8<sup>+</sup> cells and the frequency of PD-1<sup>Hi</sup> CD8<sup>+</sup> cells in the brain and spinal cord of mice treated with anti-IFN- $\gamma$  mAb or control IgG. **D**) Distribution of myeloid cells that were PD-L1<sup>+</sup>CD11b<sup>+</sup> in the brain and spinal cord of anti-IFN- $\gamma$  or isotype mAb-treated mice with CD8-EAE that were sacrificed on day 7 post-transfer. **E**) Histograms and quantification of PD-L1 MFI among CD45<sup>+</sup> cells from mice treated with  $\alpha$ IFN- $\gamma$  or control IgG. **F**) Histograms depicting expression of PD-L1 among CD11b<sup>+</sup> cells and the MFI of PD-L1 among CD11b<sup>+</sup> cells in the brain and spinal cord of mice treated with anti-IFN- $\gamma$  mAb or control IgG. Significance was determined by a t-test.
